# Supplementary material for: Biological significance and prognostic/predictive impact of complex karyotype in chronic lymphocytic leukemia
Source: PubMed Central journal article supplement (PMC6188145; doi:10.18632/oncotarget.26146), 2018-09-28
Supplement: oncotarget-09-34398-s001.pdf [file oncotarget-09-34398-s001.pdf]

## Biological significance and prognostic/predictive impact of complex karyotype in chronic lymphocytic leukemia

### SUPPLEMENTARY MATERIALS

Supplementary Table 1: Association between complex karyotype, gene mutations and other biomarkers<sup>^</sup>

| Reference         | *N. pts | CK            | Binet B/C        | P     | <i>17p-/TP53<sup>MUT</sup></i> | P       | <i>11q-/ATM<sup>MUT</sup></i> | P      | <i>FBXW7<sup>MUT</sup></i> | P     | <i>MYD88<sup>MUT</sup></i> | P     | <i>U-IGHV</i>   | P      | <i>CD38+</i>    | P     |
|-------------------|---------|---------------|------------------|-------|--------------------------------|---------|-------------------------------|--------|----------------------------|-------|----------------------------|-------|-----------------|--------|-----------------|-------|
| [22]              | n=500   | n=82 (16.4%)  | -                | -     | 23/82 (28%)                    | <0.0001 | -                             | -      | -                          | -     | -                          | -     | 36/69 (52.2%)** | 0.034  | 42/68 (61.8%)** | 0.02  |
| [23]              | n=1001  | n=157 (15.7%) | 28/112 (22.9%)** | 0.05  | 34/122 (28%)**                 | <0.001  | 42/150 (28%)**                | <0.001 | -                          | -     | -                          | -     | 41/81 (50%)**   | 0.004  | -               | -     |
| [29]              | n= 110  | n=38 (34.5%)  | -                | -     | (9/38) 24%                     | 0.02    | 16/38 (42%)                   | 0.02   | -                          | -     | 1/38 (2.6%)                | ∅     | 34/38 (89%)     | 0.001  | -               | -     |
| [24]              | n=154   | n=30 (19.5%)  | -                | -     | 8/30 (26.7%)                   | 0.005   | 7/30 (23.3%)                  | ∅      | 5/30 (16.7%)               | 0.025 | -                          | ∅     | 22/30 (73.3%)   | ∅      | -               | -     |
| [26]              | n=195   | n=28 (14.4%)  | -                | -     | 6/28 (21.4%)                   | 0.003   | 4/28 (14.3%)                  | 0.018  | 0/28 (0%)                  | ∅     | 4/28 (14.3%)               | 0.001 | -               | -      | -               | -     |
| [63] <sup>§</sup> | n=1043  | n=99 (9.5%)   | 22/99 (22%)      | 0.001 | 40/99 (40.4%)                  | <0.001  | 25/99 (25.3%)                 | <0.001 | -                          | -     | -                          | -     | 15/21 (71%)**   | <0.001 | 33/99 (33%)     | 0.007 |
| [28]              | n=101   | n=21 (20.8%)  | 7/21 (33.3%)     | ∅     | 8/21 (38.1%)                   | 0.021   | 4/21 (19%)                    | ∅      | -                          | -     | -                          | -     | 19/21 (90.4%)   | ∅      | 14/21 (66.7%)   | ∅     |
| [27]              | n=287   | n=41 (14.3%)  | 13/41 (31.7%)    | 0.013 | 7/33 (21.2%)**                 | 0.001   | 9/41 (21.9%)                  | 0.01   | -                          | -     | -                          | -     | 17/31 (54.8%)** | ∅      | 25/41 (61%)     | 0.003 |

<sup>^</sup> the p values refer to the frequency of each biomarker in the subgroup of patients with CK as compared with patients without CK

\* N. of patients assessed by conventional banding analysis

<sup>§</sup> MBL or CLL patients

\*\*data available for a subgroup of patients

∅ = not significant
